# Supplementary material for: Breast cancer suppression by aplysin is associated with inhibition of PI3K/AKT/FOXO3a pathway
Source: PubMed Central journal article supplement (PMC5609973; doi:10.18632/oncotarget.19209), 2017-07-12
Supplement: oncotarget-08-63923-s001.pdf [file oncotarget-08-63923-s001.pdf]

## Breast cancer suppression by aplysin is associated with inhibition of PI3K/AKT/FOXO3a pathway

### SUPPLEMENTARY MATERIALS

Supplementary Table 1: shFOXO3a targeting sequences

| shFOXO3a   | sequences                   |
|------------|-----------------------------|
| shFOXO3a-1 | 5'-GCACAACCTGTCACTGCATAG-3' |
| shFOXO3a-2 | 5'-GGGCTGTCTCCATGGACAATA-3' |
| shFOXO3a-3 | 5'-GGAACGTGATGCTTCGCAATG-3' |
| shFOXO3a-4 | 5'-GCTCACTTCGGACTCACTTAG-3' |

**Supplementary Table 2: Primers for Quantitative real-time PCR (5'→3')****The oligonucleotides used as PCR primers**

|                                                  |                                                   |
|--------------------------------------------------|---------------------------------------------------|
| cyclinD1(rat) forward:<br>GAGGCGGATGAGAACAAGCA   | cyclinD1(homo) forward:<br>CCGATGCCAACCTCCTCAAC   |
| cyclinD1 (rat) reverse:<br>CGGTAGCAGGAGAGGAAGTTG | cyclinD1 (homo) reverse:<br>CTCCTCCTCGCACTTCTGTTC |
| p21 (rat) forward:<br>AAGCAGTCACAGCCTAGAACAA     | p21 (homo) forward:<br>GTCCAGCGACCTTCTCATC        |
| p21 (rat) reverse:<br>GAGAGCAGCAGATCACCAGATT     | p21 (homo) reverse:<br>TAGCCTCTACTGCCACCATCT      |
| p27(rat) forward:<br>GAAGCACTGCCGAGATATGGA       | p27(homo) forward:<br>GAGTGGCAAGAGGTGGAGAAG       |
| p27 (rat) reverse:<br>CACCTCCTGCCACTCGTATC       | p27 (homo) reverse:<br>ATGCGTGTCTCAGAGTTAGC       |
| Bim (rat) forward:<br>CCAGAGATACGGATCGCACAG      | Bim (homo) forward:<br>GTATTTCGGTTCGCTGCGTTCC     |
| Bim (rat) reverse:<br>CTCCATACCAGACGGAAGATGA     | Bim (homo) reverse:<br>TCTACCTTCTCGGTCACACTCA     |
| TRAIL (rat) forward:<br>AATCGGACTAGCTTGCTTCTCA   | TRAIL (homo) forward:<br>GGCTGCCTGGCTGACTTACA     |
| TRAIL (rat) reverse:<br>GCTGATACAGTTGCCTCTTGAC   | TRAIL (homo) reverse:<br>GGAGCACTGTGAAGATCACGATC  |
| FasL (rat) forward:<br>TCCACCACCACCTCCATCAC      | FasL (homo) forward:<br>TGGTTCTGGTTGCCTTGGTAG     |
| FasL (rat) reverse:<br>CATTCCAACCAGAGCCACCAG     | FasL (homo) reverse:<br>CCTTGAGTTGGACTTGCCTGT     |
| GAPDH (rat) forward:<br>AGTTCAACGGCACAGTCAAGG    | GAPDH (homo) forward:<br>TGATGGTCGGCTGCGTGTA      |
| GAPDH (rat) reverse:<br>ACATACTCAGCACCAGCATCAC   | GAPDH (homo) reverse:<br>GGGCTCAGGGCATAACAGAA     |
